# Supplementary material for: A quasi-integral controller for adaptation of genetic modules to variable ribosome demand
Source: PubMed Central journal article supplement (PMC6303309; doi:10.1038/s41467-018-07899-z), 2018-12-21
Supplement: 41467_2018_7899_MOESM3_ESM.pdf [file 41467_2018_7899_MOESM3_ESM.pdf]

**Title:** Supplementary Software (MATLAB Code.zip):

**Description:** MATLAB script files including the following items: a. ReadMe.txt: a brief description of MATLAB scripts in this folder b. Main\_Figure\_Huang\_et\_al.m: MATLAB code to generate all main text figures and Supplementary Figures 15 and 18 c. Supp\_Fig\_16.m: MATLAB code to generate Supplementary Figure 16 d. Supp\_Fig\_17.m: MATLAB code to generate Supplementary Figure 17 e. The following custom MATLAB functions used in the scripts above: sRNA\_silencing.m, sRNA\_feedback.m, sRNA\_feedback\_sat.m and ActCascade.m.
